# Supplementary material for: (Ni,Co)Se@Ni(OH)2 heterojunction nanosheets as an efficient electrocatalyst for the hydrogen evolution reaction
Source: Royal Society of Chemistry journal article supplement (doi:10.1039/d0dt03654d), 2020-12-09
Supplement: d0dt03654d1.pdf [file d0dt03654d1.pdf]

# **(Ni,Co)Se@Ni(OH)<sub>2</sub> heterojunction nanosheet as an efficient electrocatalyst for hydrogen evolution reaction**

Yunmei Du<sup>[a,1]</sup>, Huimin Zhao<sup>[a,1]</sup>, Wensi Wang<sup>[a]</sup>, Yu Yang<sup>[a]</sup>, Minghui Wang<sup>[a]</sup>, Shaoxiang Li<sup>[b]</sup>,

Yanru Liu<sup>[a]\*</sup> and Lei Wang<sup>[a,b]\*</sup>

*[a] Key Laboratory of Eco-chemical Engineering, Ministry of Education, Laboratory of Inorganic Synthesis and Applied Chemistry, College of Chemistry and Molecular Engineering, Qingdao University of Science and Technology, Qingdao 266042, P. R. China*

*[b] Shandong Engineering Research Center for Marine Environment Corrosion and Safety Protection, College of Environment and Safety Engineering, Qingdao University of Science and Technology, Qingdao 266042, P. R. China*

---

\* Corresponding author. Email: [liuyanru@qust.edu.cn](mailto:liuyanru@qust.edu.cn) (Y.R. Liu), [inorchemwl@126.com](mailto:inorchemwl@126.com) (L. Wang)

<sup>1</sup> Equal contribution

**Figure S1.** (a) XPS spectra of the  $\text{NC}_x\text{S@NH}$  ( $x=1.5, 2, 2.5$ ): (a) Ni 2p, (b) Co 2p (c) Se 3d and (d) S 2p spectrum.

**Table S1.** Comparison of HER activity of  $(\text{NiCo}_2)\text{Se@Ni(OH)}_2$  catalyst with other reported transition metal selenides catalysts.

**Figure S2.** XRD of the  $\text{NCS@NH}$  and the  $\text{NCS@NH}$  after 2000 cycles.

**Figure S3.** SEM images of the  $\text{NCS@NH}$  after 2000 cycles.

**Figure S4.** (a) XPS spectra of the  $\text{NCS@NH}$  and  $\text{NCS@NH}$  after 2000 cycles: (a) Ni 2p, (b) Co (c) Se 3d and (d) S 2p spectrum.

**Figure S5.** (a) TEM images and (b) HRTEM images of the  $\text{NCS@NH}$  after it test.

**Figure S6.** Cyclic voltammetry curves of the  $\text{NiCo}_2\text{S}_4\text{@NH}$  in 1.0 M KOH under different scan rate in a region of 0.8 to 0.85 V vs RHE.

**Figure S7.** XRD of the  $\text{CoNiSe}_2\text{@CoO}$ .

**Figure S8.** SEM images of the  $\text{CoNiSe}_2\text{@CoO}$ .

**Figure S9.** Electrochemical performances: (a) HER polarization curves, (b) the Tafel plots and (c) Nyquist plots of  $\text{CoNiSe}_2\text{@CoO}$  and  $\text{NCS@NH}$ .

**Figure S10.** XRD of the  $\text{NCS}_x$  ( $x=1, 1.5$ ).

**Figure S11.** SEM images of the  $\text{NCS}_{1.5}$ .

**Figure S12.** Electrochemical performances: (a) HER polarization curves, (b) the Tafel plots and (c) Nyquist plots of  $\text{NCS@NH}$  and  $\text{NCS}_{1.5}$ .

## **Experiment**

### **Electrochemical measurements**

Electrochemical measurements were performed in 1.0 M KOH solution at 25°C, and used a three-electrode system with graphite rod as the counter electrode and Hg/HgCl<sub>2</sub> (SCE, CHI104, China) electrode, The NCS@NH and other samples electrodes immersed into electrolyte was 1 × 1 cm<sup>2</sup>, which were used as working electrodes. In alkaline solution,  $E(\text{RHE}) = E(\text{SCE}) + 0.243 \text{ V} + 0.0592 * \text{pH}$ .

### **Characterization**

Phase analysis of all as-prepared samples was measured with X-ray powder diffraction with Rigaku D-MAX-2500/PC using Cu K $\alpha$  radiation. The morphologies and structures of the samples was observed with scanning electron microscopy (SEM) with Zeiss sigma-500, transmission electron microscopy (TEM; FEI, Tecnai G2 F20) and high-resolution transmission electron microscope (HRTEM). The surface element analysis were confirmed by using X-ray photoelectron spectroscopy (XPS; Thermo Fisher Scientific, Escalab 250Xi).

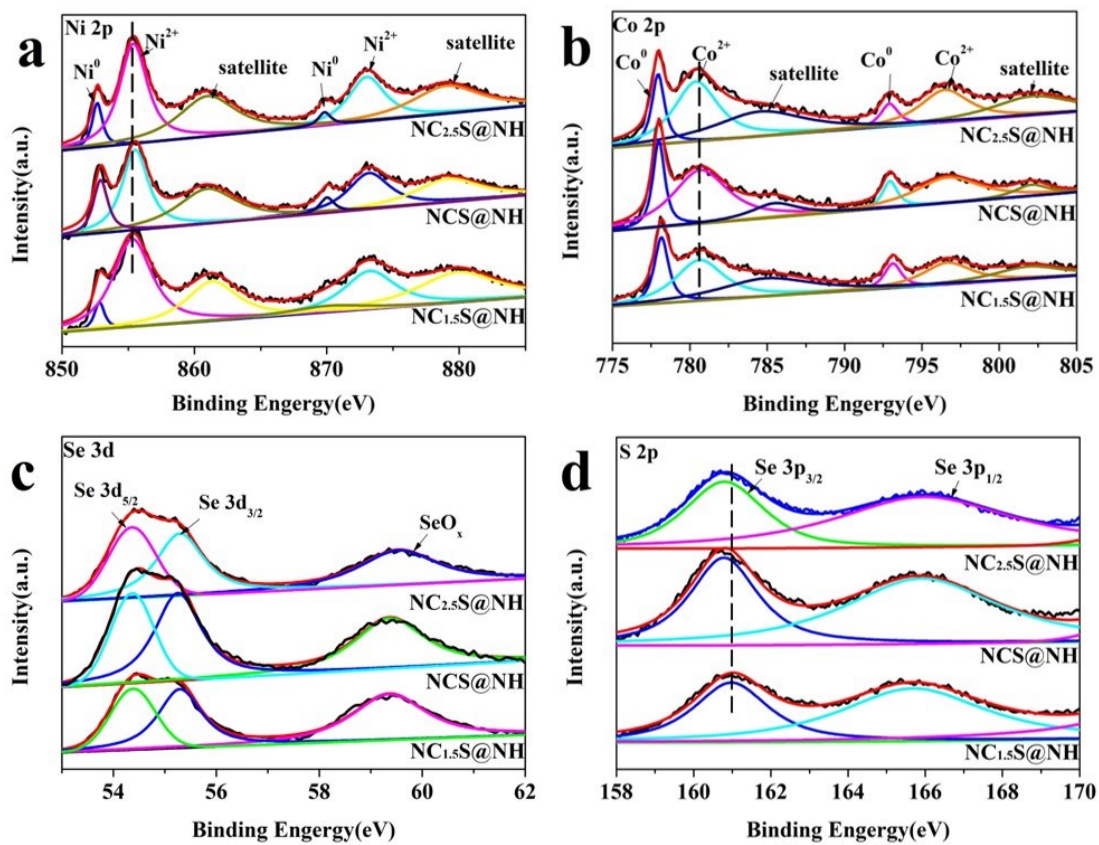

**Figure S1.** (a) XPS spectra of the  $\text{NC}_x\text{S@NH}$  ( $x=1.5, 2, 2.5$ ): (a) Ni 2p, (b) Co 2p (c) Se 3d and (d) S 2p spectrum.

**Table S1** Comparison of HER activity of (NiCo<sub>2</sub>)Se@Ni(OH)<sub>2</sub> catalyst with other reported transition metal selenides catalysts.

| Samples                                               | $\eta_{10}$ (V vs. RHE) | electrolyte                          | References |
|-------------------------------------------------------|-------------------------|--------------------------------------|------------|
| (NiCo <sub>2</sub> )Se@Ni(OH) <sub>2</sub>            | 130.8 mV                | 1 M KOH                              | This work  |
| NiCo <sub>2</sub> S <sub>4</sub> @Ni(OH) <sub>2</sub> | 148.6 mV                | 1 M KOH                              | This work  |
| (NiCo <sub>1.5</sub> )Se@Ni(OH) <sub>2</sub>          | 167.1 mV                | 1 M KOH                              | This work  |
| (NiCo <sub>2.5</sub> )Se@Ni(OH) <sub>2</sub>          | 130.7 mV                | 1 M KOH                              | This work  |
| (NiCo <sub>2</sub> )Se <sub>1.5</sub>                 | 153.8 mV                | 1 M KOH                              | This work  |
| CoNiSe <sub>2</sub> @CoO                              | 155.6 mV                | 1 M KOH                              | This work  |
| Ni-Se-Cu                                              | 136 mV                  | 1 M KOH                              | [S1]       |
| Ni-Se <sub>1.2</sub> -S <sub>0.8</sub>                | 144 mV                  | 1 M KOH                              | [S2]       |
| Ni <sub>0.85</sub> Se@NC                              | 135 mV                  | 1 M KOH                              | [S3]       |
| CoSe <sub>2</sub> /MoSe <sub>2</sub>                  | 168 mV                  | 1 M KOH                              | [S4]       |
| NiSe <sub>2</sub> @NC                                 | 162 mV                  | 1 M KOH                              | [S5]       |
| 30wt%MWCNTs/Co <sub>0.85</sub> Se                     | 266 mV                  | 0.5 M H <sub>2</sub> SO <sub>4</sub> | [S6]       |
| Ni <sub>0.54</sub> W <sub>0.26</sub> Se               | 162 mV                  | 1 M KOH                              | [S7]       |
| 3 at. % Zn-doped MoSe <sub>2</sub>                    | 231 mV                  | 0.5 M H <sub>2</sub> SO <sub>4</sub> | [S8]       |
| P-1T/2H-MoSe <sub>2</sub> -1                          | 174 mV                  | 0.5 M H <sub>2</sub> SO <sub>4</sub> | [S9]       |
| Ni <sub>3</sub> Se <sub>2</sub> /NiSe NWs             | 198 mV                  | 1 M KOH                              | [S10]      |

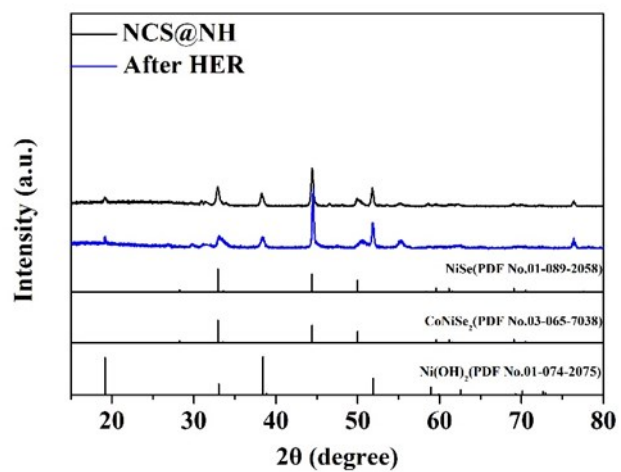

**Figure S2.** XRD of the NCS@NH and the NCS@NH after 2000 cycles.

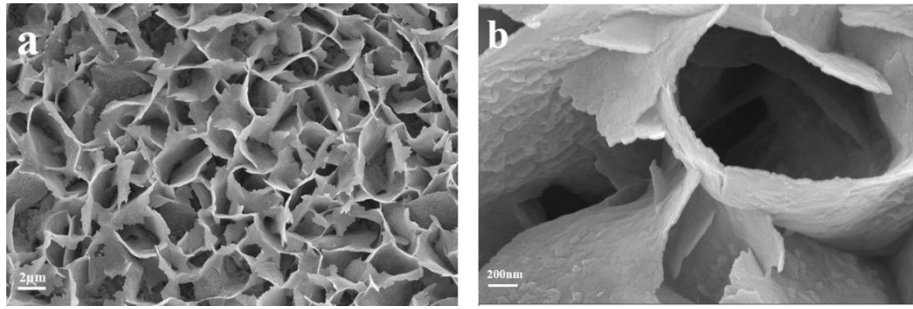

**Figure S3.** SEM images of the NCS@NH after 2000 cycles.

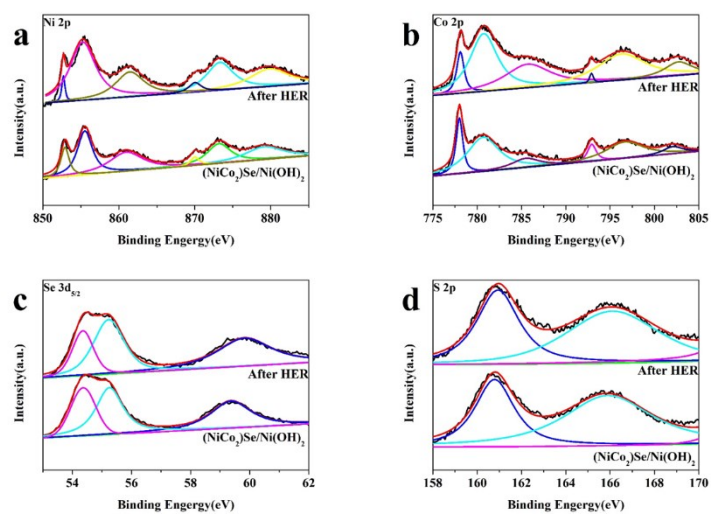

**Figure S4.** (a) XPS spectra of the NCS@NH and NCS@NH after 2000 cycles: (a) Ni 2p, (b) Co (c) Se 3d and (d) S 2p spectrum.



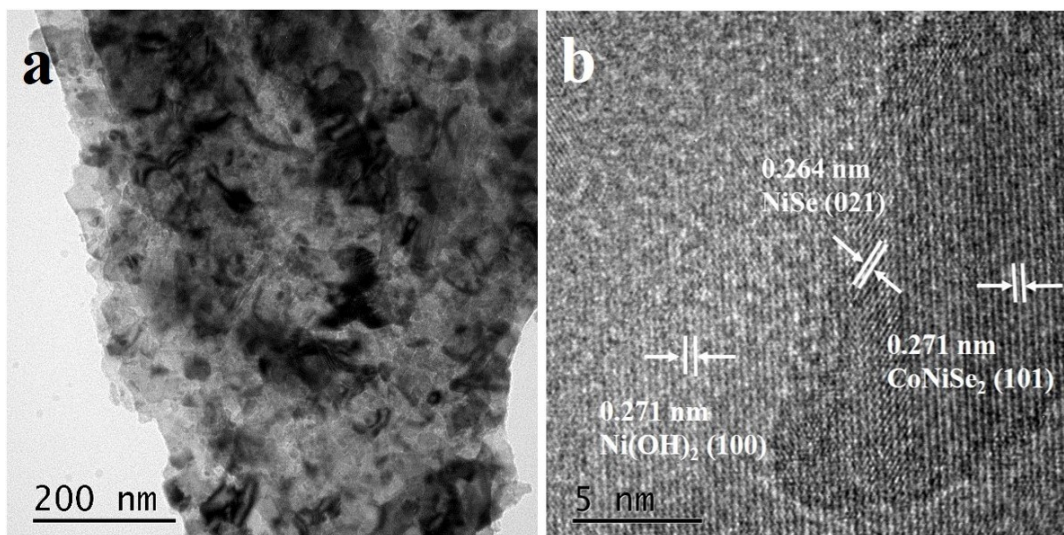

**Figure S5.** (a)TEM images and (b) HRTEM images of the NCS@NH after it test.

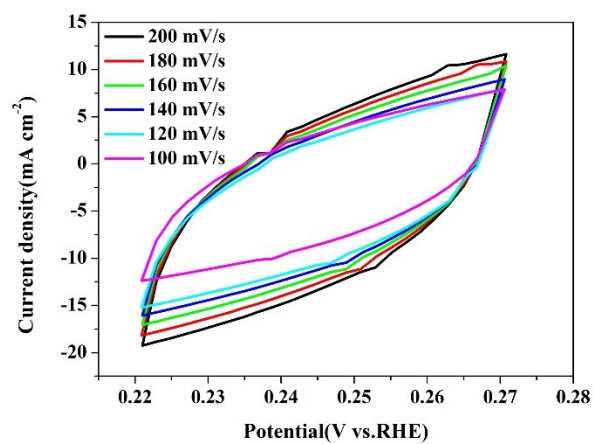

**Figure S6.** Cyclic voltammetry curves of the NiCo<sub>2</sub>S<sub>4</sub>@NH in 1.0 M KOH under different scan rate in a region of 0.8 to 0.85 V vs RHE.

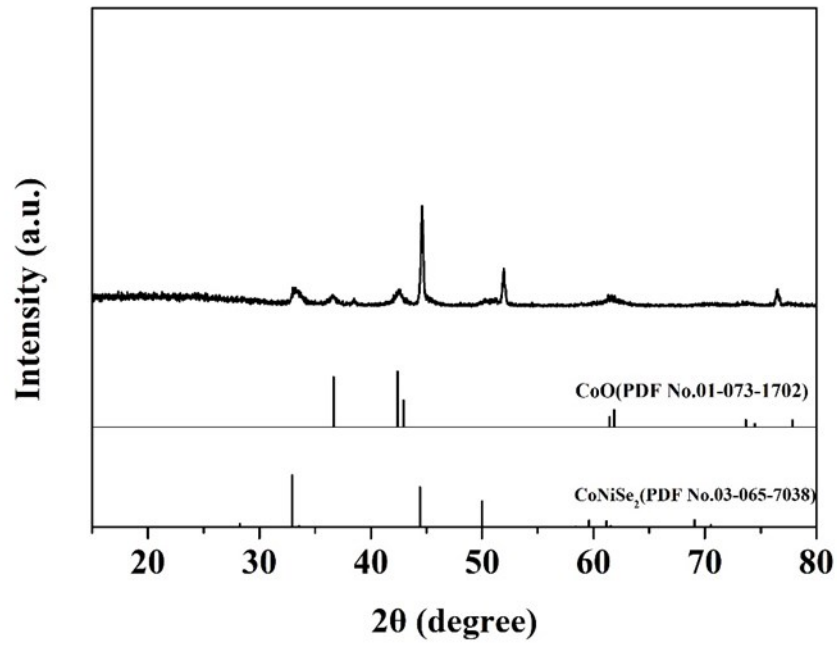

Figure S7. XRD of the CoNiSe<sub>2</sub>@CoO.

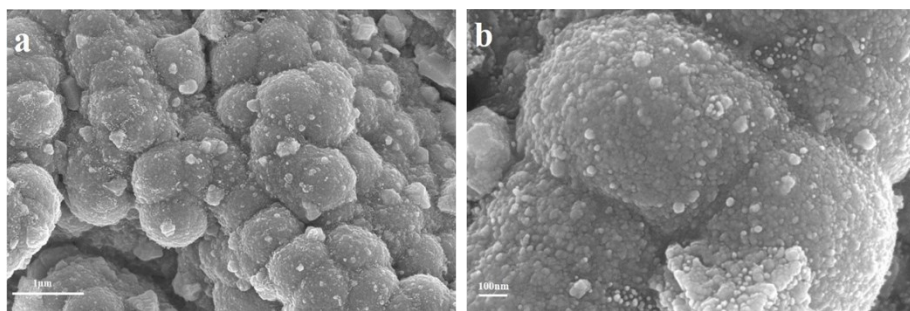

**Figure S8.** SEM images of the  $\text{CoNiSe}_2@\text{CoO}$ .

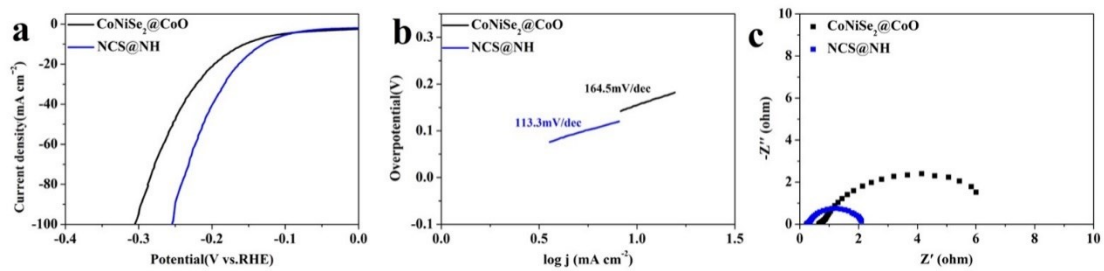

**Figure S9.** Electrochemical performances: (a) HER polarization curves, (b) the Tafel plots and (c) Nyquist plots of CoNiSe<sub>2</sub>@CoO and NCS@NH.

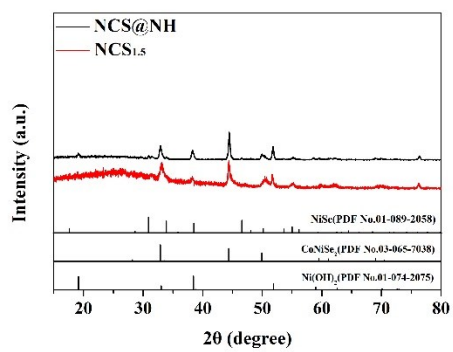

**Figure S10.** XRD of the NCS<sub>x</sub> (x=1, 1.5).

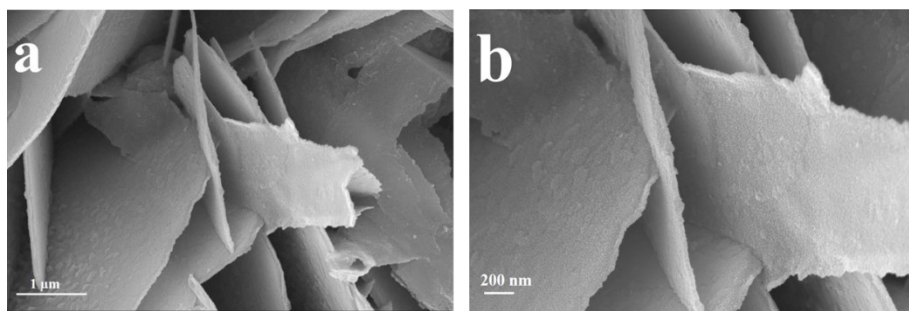

**Figure S11.** SEM images of the NCS<sub>1.5</sub>.

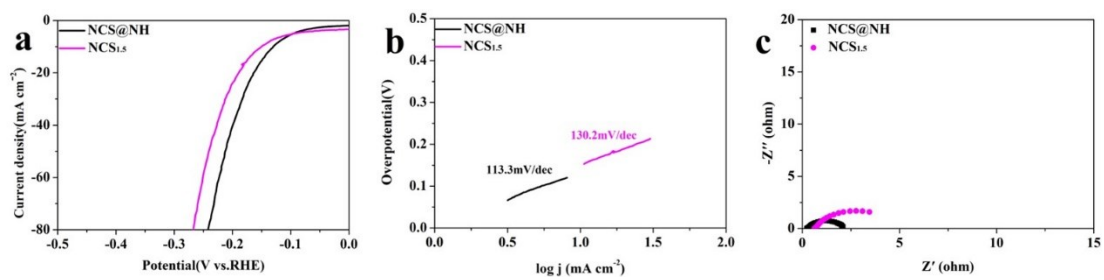

**Figure S12.** Electrochemical performances: (a) HER polarization curves, (b) the Tafel plots and (c) Nyquist plots of NCS@NH and NCS<sub>1.5</sub>.



## References

- [S1] Y. Gao, Y. Wu, H. He and W. Tan, *Journal of Colloid and Interface Science*, 2020, **578**, 555-564.
- [S2] J. Sun, X. Hu, Z. Huang, T. Huang, X. Wang, H. Guo, F. Dai and D. Sun, *Nano Research*, 2020, **13**, 2056-2062.
- [S3] Z. Huang, B. Xu, Z. Li, J. Ren, H. Mei, Z. Liu, D. Xie, H. Zhang, F. Dai, R. Wang and D. Sun, *Small*, 2020, **16**, 2004231.
- [S4] X. Tang, J-Y. Zhang, B. Mei, X. Zhang, Y. Liu, J. Wang and W. Li, *Chemical Engineering Journal*, 2021, **404**, 126529.
- [S5] Z. Huang, S. Yuan, T. Zhang, B. Cai, B. Xu, X. Lu, L. Fan, F. Dai and Da. Sun, *Applied Catalysis B: Environmental*, 2020, **272**, 118976.
- [S6] X. Sun, N. Habibul and H. Du, *Chinese Journal of Catalysis*, 2021, **42**, 235-243.
- [S7] Y. Zhao, G. Mao, Y. Du, G. Cheng and W. Luo, *Chemistry-An Asian Journal*, 2018, **13**, 2040-2045.
- [S8] J. Qian, T. Wang, B. Xia, P. Xi and D. Gao, *Electrochimica Acta*, 2019, **296**, 701-708.
- [S9] L. Chen, Y. Zhu, J. Li, H. Feng, T. Li, X. Zhang, S. Wang, M. Gu, P. Zhang and C. Zhao, *Energy Technology*, 2020, **8**, 1901503.
- [S10] H-B. Wang, Y-S. Sun, F. Ma, L. Zhou, H-F. Li, L. Zhang, G-J. Chen, Y-K. Xu, Y-N. Chen, K-W. Xu and D-Y. Ma, *Journal of Alloys and Compounds*, 2020, **819**, 153056.
